# Supplementary material for: Bioerosion by pit-forming, temperate-reef sea urchins: History, rates and broader implications
Source: PubMed Central journal article supplement (PMC5821313; doi:10.1371/journal.pone.0191278), 2018-02-21
Supplement: pone.0191278.s004.pdf [file pone.0191278.s004.pdf]

**S1 Table. Tidepool dimensions, sea urchin counts, densities, and sizes from the three different sites.** All sea urchins were removed from the tidepool and test diameters (Diam) measured with knife-edge vernier calipers. Pools sampled between July 2, 2007 and June 26, 2009.

| Site                           | Pool (m) |       | Sea urchins |                   |               |
|--------------------------------|----------|-------|-------------|-------------------|---------------|
|                                | Length   | Width | N           | # m <sup>-2</sup> | Diam (mm)     |
| <b>Bodega (granite)</b>        |          |       |             |                   |               |
| 1                              | 0.35     | 0.60  | 180         | 857.1             | 28.10 ± 10.72 |
| 2                              | 4.50     | 0.60  | 245         | 90.7              | 32.01 ± 11.43 |
| 3                              | 3.50     | 1.75  | 200         | 32.7              | 19.30 ± 14.00 |
| 4                              | 2.30     | 0.80  | 649         | 352.7             | 19.65 ± 7.02  |
| <b>Palomarin (mudstone)</b>    |          |       |             |                   |               |
| 1                              | 1.25     | 0.90  | 323         | 287.1             | 43.64 ± 12.91 |
| 2                              | 2.10     | 0.80  | 197         | 117.3             | 42.93 ± 15.11 |
| 3                              | 2.85     | 0.65  | 111         | 59.9              | 49.79 ± 10.99 |
| <b>Bean Hollow (sandstone)</b> |          |       |             |                   |               |
| 1                              | 0.55     | 0.48  | 266         | 1007.6            | 21.17 ± 11.14 |
| 2                              | 1.05     | 0.72  | 146         | 193.1             | 35.72 ± 13.22 |
| 3                              | 0.75     | 0.68  | 328         | 643.1             | 24.68 ± 15.20 |
